# Supplementary material
Source: PubMed Central journal article supplement (PMC3009796)
Supplement: 1011073107_pnas.201011073SI.pdf [file 1011073107_pnas.201011073SI.pdf]

# Supporting Information

Prideaux et al. 10.1073/pnas.1011073107

## Other Supporting Information Files

[SI Appendix \(PDF\)](#)
